# Supplementary material for: Enhanced oxidative degradation of tetracycline by visible light-promoted g-C3N4 modified Cu3(OH)4SO4/Cu7S4 composites under an air atmosphere
Source: Royal Society of Chemistry journal article supplement (doi:10.1039/d3nj04276f), 2023-11-23
Supplement: d3nj04276f1.pdf [file d3nj04276f1.pdf]

# Enhanced oxidative degradation of tetracycline by visible light-promoted $\text{g-C}_3\text{N}_4$ modified $\text{Cu}_3(\text{OH})_4\text{SO}_4/\text{Cu}_7\text{S}_4$ composites under air atmosphere

Yan Wang, Haoran Li, Daqing Chen, Danhua Ge\*, Xiaojun Chen\*

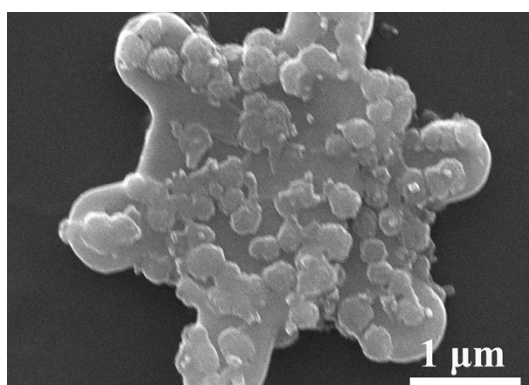

Fig. S1 SEM image of CS.

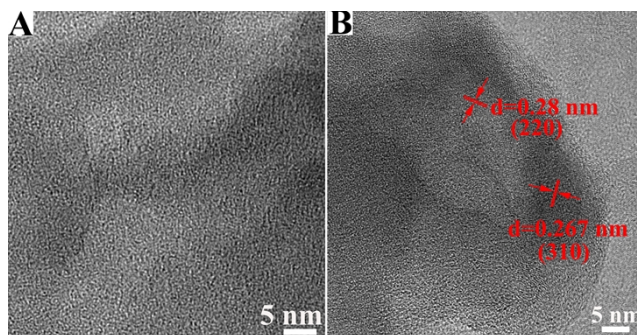

Fig. S2 HRTEM images of (A)  $\text{g-C}_3\text{N}_4$  and (B)  $\text{CSG (4:1)}$ .

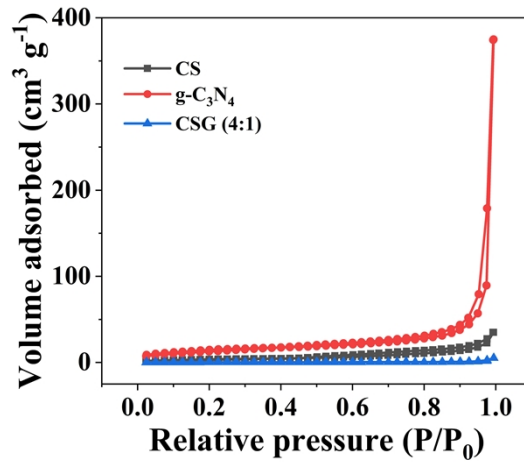

**Fig. S3** N<sub>2</sub> adsorption-desorption isotherms of CS, g-C<sub>3</sub>N<sub>4</sub> and CSG (4:1) heterojunctions.

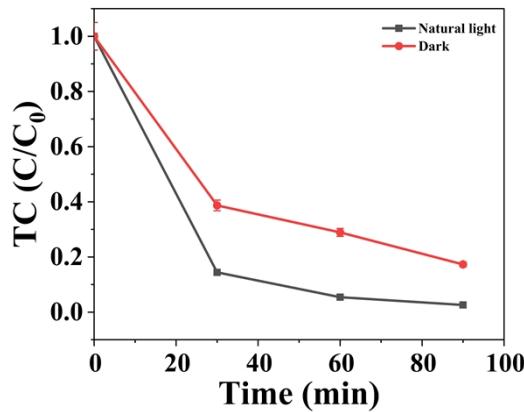

**Fig. S4** Comparison of TC removal under light irradiation and dark.

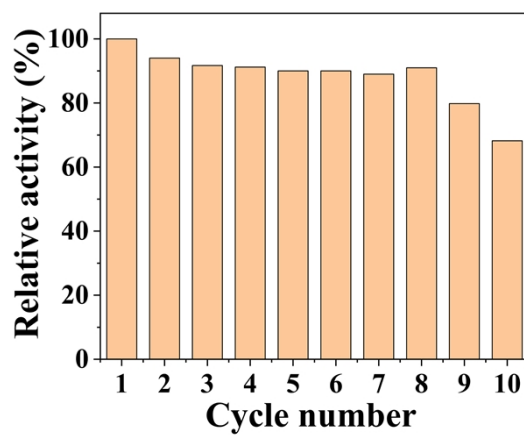

**Fig. S5** The influence of reusability for TC abatement.

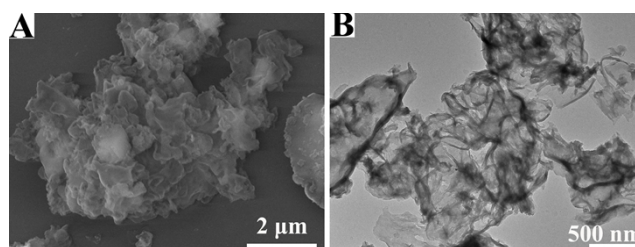

**Fig. S6** (A) SEM and (B) TEM images of CSG (4:1) after the reaction.

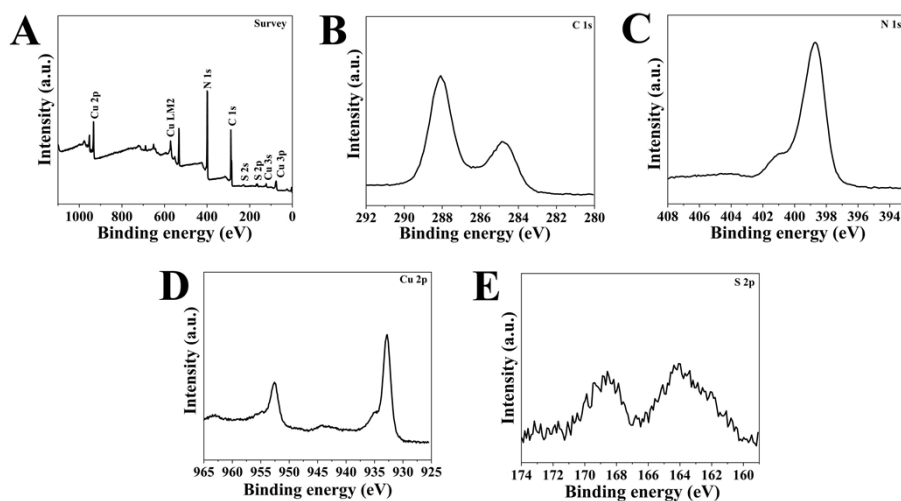

**Fig. S7** XPS spectra of CSG (4:1) after the reaction: (A) the survey, the high-resolution spectra of (B) C 1s, (C) N 1s, (D) Cu 2p and (E) S 2p.

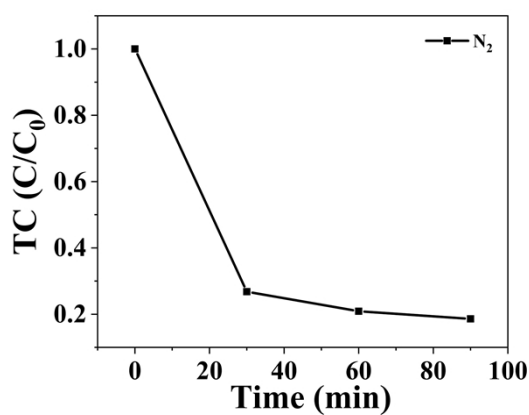

**Fig. S8** TC removal curve over CSG (4:1) heterojunctions under N<sub>2</sub> atmosphere.

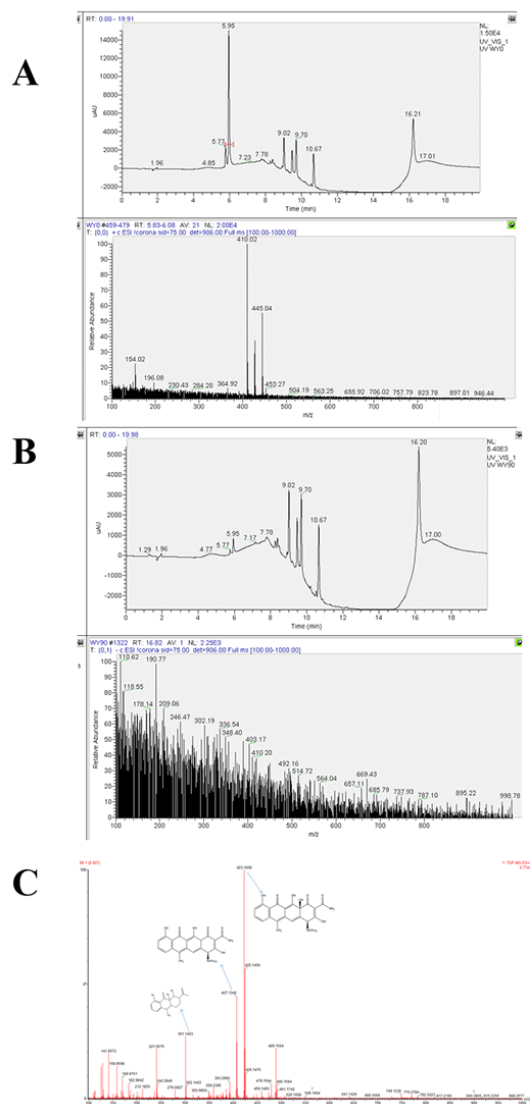

**Fig. S9** LC-MS of (A) TC and (B) TC degradation. (C) ESI-MS of TC degradation.

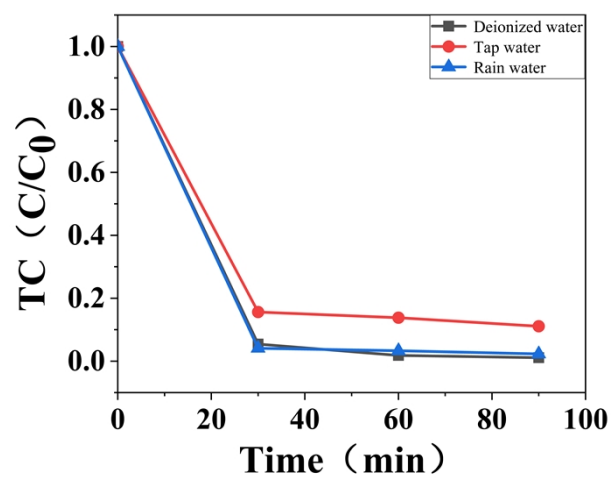

**Fig. S10** The effects of water quality on the removal efficiency of TC over CSG (4:1) heterojunctions.
